# Supplementary material for: 究極の知能テストに挑戦! 知性を支える"12の柱"とは ("天才"という神話に科学が挑む 「才能」とは何か)
Source: Springer Nature journal article supplement (doi:10.1186/s13017-022-00420-4), 2011-03-01
Supplement: MOESM1 [file 13017_2022_420_MOESM1_ESM.pdf]

## Additional File 1. Questionnaire.

### 1. In which country are you currently working?

Please, choose from the list.

### 2. Which is your profession?

- |                                 |                          |   |
|---------------------------------|--------------------------|---|
| Epidemiologist                  | <input type="checkbox"/> | 1 |
| Infection control specialist    | <input type="checkbox"/> | 2 |
| Infection diseases specialist   | <input type="checkbox"/> | 3 |
| Intensivist or anesthesiologist | <input type="checkbox"/> | 4 |
| Microbiologist                  | <input type="checkbox"/> | 5 |
| Public Health specialist        | <input type="checkbox"/> | 6 |
| Surgeon                         | <input type="checkbox"/> | 7 |
| Other profession _____          | <input type="checkbox"/> | 8 |

### 3. How many years of experience do you have?

- |                    |                          |   |
|--------------------|--------------------------|---|
| Less than 5 years  | <input type="checkbox"/> | 1 |
| 5 – 10 years       | <input type="checkbox"/> | 2 |
| 11-15 years        | <input type="checkbox"/> | 3 |
| 16 – 20 years      | <input type="checkbox"/> | 4 |
| More than 20 years | <input type="checkbox"/> | 5 |

### 4. What type of hospital are you working in?

- |                             |                          |   |
|-----------------------------|--------------------------|---|
| University Hospital         | <input type="checkbox"/> | 1 |
| Community Hospital          | <input type="checkbox"/> | 2 |
| Community teaching Hospital | <input type="checkbox"/> | 3 |
| Other _____                 | <input type="checkbox"/> | 4 |

**5. What is the setting of your hospital?**

Urban <sub>1</sub>

Suburban <sub>2</sub>

Rural <sub>3</sub>

**6. How many inpatient beds has the hospital where you practice the most of your time?**

Less than 100 <sub>1</sub>

101-500 <sub>2</sub>

501-1000 <sub>3</sub>

More than 1000 <sub>4</sub>

**7. Does your hospital have a multidisciplinary infection prevention and control (IPC) team?**

Yes <sub>1</sub>

No <sub>3</sub>

**8. Are you currently a member of the IPC team?**

Yes <sub>1</sub>

No <sub>3</sub>

**9. Which professionals does the IPC team include?**

Emergency medicine specialist <sub>1</sub>

Epidemiologist <sub>2</sub>

Hospital Administrator <sub>3</sub>

Hospital pharmacist <sub>4</sub>

Hospital pharmacologist <sub>5</sub>

Infection control specialist <sub>6</sub>

Infection diseases specialist <sub>7</sub>

Intensivist or anesthesiologist <sub>8</sub>

|                          |                          |    |
|--------------------------|--------------------------|----|
| Microbiologist           | <input type="checkbox"/> | 9  |
| Nurse                    | <input type="checkbox"/> | 10 |
| Public Health specialist | <input type="checkbox"/> | 11 |
| Surgeon                  | <input type="checkbox"/> | 12 |

**10. Is there at least a surgeon with interest/skills in surgical infections in your surgical department of your hospital?**

|     |                          |   |
|-----|--------------------------|---|
| Yes | <input type="checkbox"/> | 1 |
| No  | <input type="checkbox"/> | 3 |

**11. Does your hospital have hand wash dispensers of alcohol-based hand rub at the points of care?**

|                             |                          |   |
|-----------------------------|--------------------------|---|
| Yes                         | <input type="checkbox"/> | 1 |
| Yes, but only in some wards | <input type="checkbox"/> | 2 |
| No                          | <input type="checkbox"/> | 3 |

**12. Does your hospital have local protocols focusing on prevention of specific healthcare-associated infections?**

|                             |                          |   |
|-----------------------------|--------------------------|---|
| Yes                         | <input type="checkbox"/> | 1 |
| Yes, but only in some wards | <input type="checkbox"/> | 2 |
| No                          | <input type="checkbox"/> | 3 |

**13. Does your hospital have a protocol for surgical antibiotic prophylaxis?**

|                             |                          |    |
|-----------------------------|--------------------------|----|
| Yes                         | <input type="checkbox"/> | 1  |
| Yes, but only in some wards | <input type="checkbox"/> | 2  |
| No                          | <input type="checkbox"/> | 37 |

**14. Does the protocol for surgical antibiotic prophylaxis consider interventions to discontinue prophylaxis in the post-operative period?**

|     |                          |   |
|-----|--------------------------|---|
| Yes | <input type="checkbox"/> | 1 |
|-----|--------------------------|---|

Yes, but only in some wards <sub>2</sub>

No <sub>3</sub>

**15. Does your hospital use alcohol-based solutions for surgical site preparation?**

Yes <sub>1</sub>

Yes, but only in some wards <sub>2</sub>

No <sub>3</sub>

**16. Does your hospital have a surveillance system for surgical site infections?**

Yes <sub>1</sub>

Yes, but only in some wards <sub>2</sub>

No <sub>3</sub>

**17. Does your hospital have a system for root cause analysis/review of surgical site infections?**

Yes <sub>1</sub>

No <sub>3</sub>

**18. Does your hospital have a multidisciplinary antimicrobial stewardship team (AST)?**

Yes <sub>1</sub>

No <sub>3</sub>

**19. Are you currently a member of the AST team?**

Yes <sub>1</sub>

No <sub>3</sub>

**20. Which professionals does the AST team include?**

Emergency medicine specialist <sub>1</sub>

Epidemiologist <sub>2</sub>

|                                 |                          |    |
|---------------------------------|--------------------------|----|
| Hospital Administrator          | <input type="checkbox"/> | 3  |
| Hospital pharmacist             | <input type="checkbox"/> | 4  |
| Hospital pharmacologist         | <input type="checkbox"/> | 5  |
| Infection control specialist    | <input type="checkbox"/> | 6  |
| Infection diseases specialist   | <input type="checkbox"/> | 7  |
| Intensivist or anesthesiologist | <input type="checkbox"/> | 8  |
| Microbiologist                  | <input type="checkbox"/> | 9  |
| Nurse                           | <input type="checkbox"/> | 10 |
| Public Health specialist        | <input type="checkbox"/> | 11 |
| Surgeon                         | <input type="checkbox"/> | 12 |

**21. Does your hospital have a protocol for antimicrobial therapy?**

Yes  1

No  3

**22. Does the protocol for antimicrobial treatment of surgical infections consider interventions to reduce the duration of therapy?**

Yes  1

No  3

**23. Does the protocol for antimicrobial treatment of surgical infections advocate for alternative dosing strategies based on pharmacokinetic/pharmacodynamic principles?**

Yes  1

No  3

**24. Does your hospital have systems for rapid laboratory testing?**

Yes  1

No  3

**25. Does your hospital perform a monitoring system of used antimicrobials?**

Yes <sub>1</sub>

Yes, but only in some wards <sub>2</sub>

No <sub>3</sub>

**26. Does your hospital periodically carry out systematic reports about resistance data?**

Yes <sub>1</sub>

Yes, but only in some wards <sub>2</sub>

No <sub>3</sub>

**27. Did your hospital carry out structural interventions finalized to improve antimicrobial stewardship programs and infection prevention and control programs in the last 5 years?**

Yes <sub>1</sub>

No <sub>3</sub>

**28. Does your hospital have a 24-hour CT scan for emergency cases?**

Yes <sub>1</sub>

No <sub>3</sub>

**29. Does your hospital have a 24-hour interventional radiology service for emergency cases?**

Yes <sub>1</sub>

No <sub>3</sub>

**30. Does your hospital have a dedicated operating room for emergency surgery?**

Yes <sub>1</sub>

No <sub>3</sub>

**31. Does your hospital have a surgical intensive care unit?**

Yes <sub>1</sub>

No <sub>3</sub>

**32. How much are basic infection control precautions respected in your hospital?**

Please, rank from 10 (very respected) to 1 (very unrespected).

**33. How much are basic antibiotic prescribing practices respected in your hospital?**

Please, rank from 10 (very respected) to 1 (very unrespected).

**34. How much are basic principles of source control respected in your hospital?**

Please, rank from 10 (very respected) to 1 (very unrespected).

**35. How much is teamwork culture important in your hospital?**

Please, rank from 10 (very important) to 1 (very unimportant).

**36. How much is patient safety culture important in your hospital?**

Please, rank from 10 (very important) to 1 (very unimportant).

**37. How much is evidence-based culture important in your hospital?**

Please, rank from 10 (very important) to 1 (very unimportant).

**38. How much are healthcare workers involved in infection risk in your hospital?**

Please, rank from 10 (very involved) to 1 (very uninvolved).

**39. How much are patients and families involved to help and support the journey to safer infections management in your hospital?**

Please, rank from 10 (very involved) to 1 (very uninvolved).

**40. How much does education of healthcare workers contribute to the design and delivery of safe systems for infections management in your hospital?**

Please, rank from 10 (very important contribution) to 1 (very unimportant contribution).

**41. How much does motivation of healthcare workers contribute to the design and delivery of safe systems for infections management in your hospital?**

Please, rank from 10 (very important contribution) to 1 (very unimportant contribution).

**42. How much is awareness of the global burden of antibiotic resistance widespread among healthcare workers in your hospital?**

Please, rank from 10 (very aware) to 1 (very unaware).

**43. How much has the COVID-19 pandemic raised your awareness of adequate infection prevention and control?**

Please, rank from 10 (very important role) to 1 (very unimportant role).

**44. How much has the COVID-19 pandemic raised your awareness of appropriate antibiotic prescribing practices?**

Please, rank from 10 (very important role) to 1 (very unimportant role).
